# Supplementary material for: TNFAIP3 Deficiency Affects Monocytes, Monocytes-Derived Cells and Microglia in Mice
Source: MDPI journal article supplement (doi:10.3390/ijms21082830), 2020-04-18
Supplement: s1 [file s1]

**Table 1S. Summary table of the flow cytometry results obtained in spleen, lymph nodes and bone marrow from 3 months-old WT and TNFAIP3<sup>cx3cr1-KO</sup> mice**

|                                                                          | <b>Spleen</b>                                        | <b>Lymph nodes</b>                                   | <b>Bone marrow</b>                                   |
|--------------------------------------------------------------------------|------------------------------------------------------|------------------------------------------------------|------------------------------------------------------|
|                                                                          | <b>TNFAIP3<sup>cx3cr1-KO</sup><br/>versus<br/>WT</b> | <b>TNFAIP3<sup>cx3cr1-KO</sup><br/>versus<br/>WT</b> | <b>TNFAIP3<sup>cx3cr1-KO</sup><br/>versus<br/>WT</b> |
| <b>CD11b<sup>+</sup>F4/80<sup>+</sup><br/>macrophages</b>                | ↓↓                                                   | ↓↓                                                   | not analyzed                                         |
| <b>CD11b<sup>+</sup>Ly6-C<sup>+</sup>Ly6-G<sup>+</sup><br/>monocytes</b> | ↓                                                    | NC                                                   | not analyzed                                         |
| <b>CD11c<sup>+</sup>CD86<sup>+</sup><br/>dendritic cells</b>             | ↓                                                    | ↑                                                    | not analyzed                                         |
| <b>CD49b<sup>+</sup><br/>NK-cells</b>                                    | NC                                                   | ↓↓                                                   | not analyzed                                         |
| <b>CD3<sup>+</sup>CD49b<sup>+</sup><br/>NK T-cells</b>                   | NC                                                   | ↓↓                                                   | not analyzed                                         |
| <b>B220<sup>+</sup><br/>B-cells</b>                                      | ↓                                                    | ↑                                                    | not analyzed                                         |
| <b>CD3<sup>+</sup><br/>T-cells</b>                                       | NC                                                   | NC                                                   | not analyzed                                         |
| <b>CD3<sup>+</sup>CD4<sup>+</sup><br/>T-cells</b>                        | NC                                                   | NC                                                   | not analyzed                                         |
| <b>CD3<sup>+</sup>CD8<sup>+</sup><br/>T-cells</b>                        | NC                                                   | ↑                                                    | not analyzed                                         |
| <b>Common myeloid precursors<br/>(CMPs)</b>                              | not analyzed                                         | not analyzed                                         | NC                                                   |
| <b>Common monocyte and<br/>granulocyte precursor cells<br/>(CMGPs)</b>   | not analyzed                                         | not analyzed                                         | ↓↓                                                   |

↓↓; percentage number of cells is significantly reduced in TNFAIP3<sup>cx3cr1-KO</sup> compared to WT mice (Mann-Whitney test, \*\* p<0,01)

↓; percentage number of cells is significantly reduced in TNFAIP3<sup>cx3cr1-KO</sup> compared to WT mice (Mann-Whitney test, \* p<0,05)

↑; percentage number of cells is significantly increased in TNFAIP3<sup>cx3cr1-KO</sup> compared to WT mice (Mann-Whitney test, \* p<0,05)

NC; no changes observed
